# Supplementary material for: Novel bifunctional cap for simultaneous electroencephalography and transcranial electrical stimulation
Source: Sci Rep. 2018 May 8;8:7259. doi: 10.1038/s41598-018-25562-x (PMC5940899; doi:10.1038/s41598-018-25562-x)
Supplement: Supplementary file 1 — Supplementary Material [file 41598_2018_25562_MOESM1_ESM.pdf]

# Novel bifunctional cap for simultaneous electroencephalography and transcranial electrical stimulation

Sophia Wunder<sup>1,2</sup>, Alexander Hunold<sup>1</sup>, Patrique Fiedler<sup>1</sup>, Falk Schlegelmilch<sup>2</sup>, Klaus Schellhorn<sup>2</sup>, Jens Haueisen<sup>1,3</sup>

<sup>1</sup> Institute of Biomedical Engineering and Informatics, Technische Universität Ilmenau, 98693 Ilmenau, Germany

<sup>2</sup> neuroConn GmbH, 98693 Ilmenau, Germany

<sup>3</sup> Department of Neurology, Biomagnetic Center, Jena University Hospital, 07747 Jena, Germany

## Supplementary Material

**Supplementary Table 1 | Results of impedance measurements between one Ag/AgCl reference electrode on the forehead and the textile stimulation electrode area and four position on the textile outside the diffusion barrier, respectively. This proposes a successful verification the cleaning procedure and integrity of the diffusion barrier.**

| Impedance / kΩ between reference electrode and positions on the: |                                |                    |                                  |                    |         |         |
|------------------------------------------------------------------|--------------------------------|--------------------|----------------------------------|--------------------|---------|---------|
|                                                                  | Inside of the stimulation area |                    | Outside of the diffusion barrier |                    |         |         |
|                                                                  | Mean                           | Standard deviation | Mean                             | Standard deviation | Maximum | Minimum |
| Before laundering                                                | 40.2                           | 3.1                | 466.2                            | 434.0              | 1300.0  | 108.7   |
| After 50 laundering cycles                                       | 38.5                           | 5.6                | 510.4                            | 336.6              | 1300.0  | 110.0   |
| After 100 laundering cycles                                      | 26.7                           | 14.4               | 407.6                            | 307.9              | 1290.0  | 84.7    |

**Supplementary Table 2 | The results of statistical analysis between pre- and post-tDCS (VEP1 and VEP4) are listed for the amplitude of the analyzed VEP components in the EEG (PO1, PO2, POz).**

|           |               | p-value       |               |               |
|-----------|---------------|---------------|---------------|---------------|
|           | VEP component | PO1<br>n = 10 | PO2<br>n = 10 | POz<br>n = 10 |
| Amplitude | N75           | 0.241         | 0.022 *       | 0.093         |

\* Asymptotic significance of Wilcoxon rank sum test ( $p < 0.033$  Bonferroni corrected)

**Supplementary Table 3 | The results of statistical analysis between pre-tDCS and during tDCS (VEP1 and VEP2) are listed for the amplitude of the analyzed VEP components in the EEG (PO1, PO2, POz).**

|           |               | p-value      |              |              |
|-----------|---------------|--------------|--------------|--------------|
|           | VEP component | PO1<br>n = 6 | PO2<br>n = 8 | POz<br>n = 6 |
| Amplitude | P100          | 0.028 *      | 0.012 *      | 0.028 *      |

\* Asymptotic significance of Wilcoxon rank sum test ( $p < 0.033$  Bonferroni corrected)
